# Supplementary material
Source: PubMed Central journal article supplement (PMC7844148)
Supplement: S0899823X20014294sup001.pdf [file S0899823X20014294sup001.pdf]

# Supplementary Material - Donning and doffing PPE technique

## Donning technique

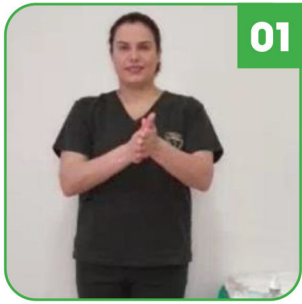

01 Remove gloves and hand hygiene

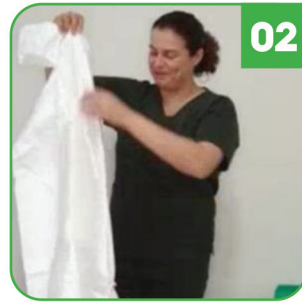

02 Unzip coverall PPE

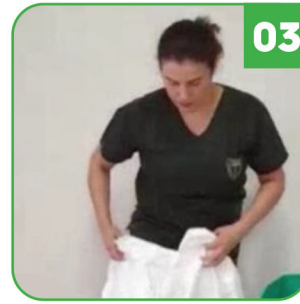

03 Dress coverall from the feet up to the head

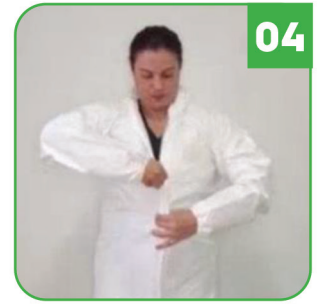

04 Zip coverall

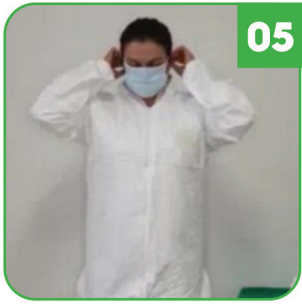

05 Put on mask

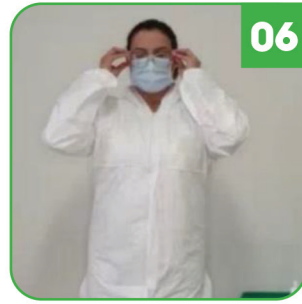

06 Put on head cap

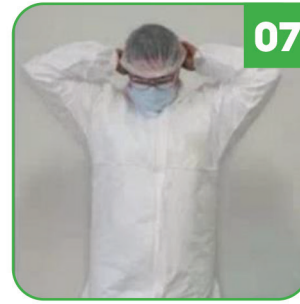

07 Put on eye protection

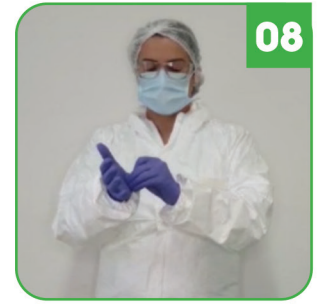

08 Put on gloves

## Doffing technique

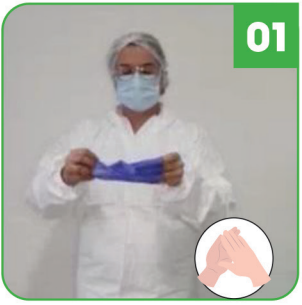

01 Remove gloves and hand hygiene

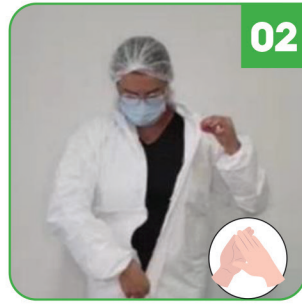

02 Unzip coverall and hand hygiene

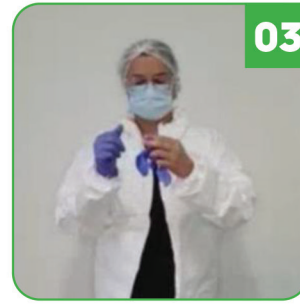

03 Put on another pair of gloves

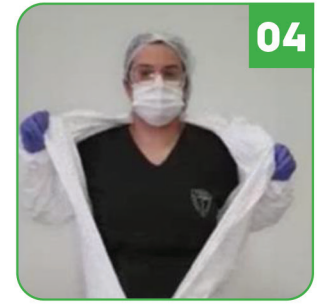

04 Remove coverall with a backward movement

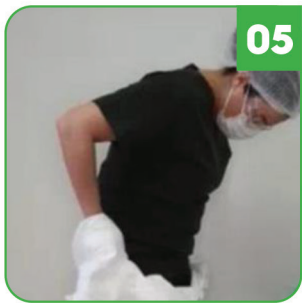

05 Remove coverall by rolling it up

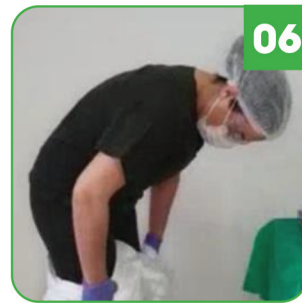

06 Roll the coverall down the ankle

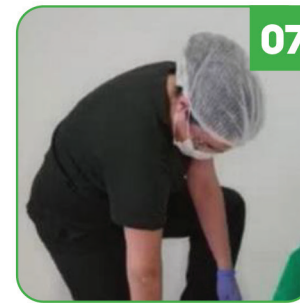

07 Complete removal by feet

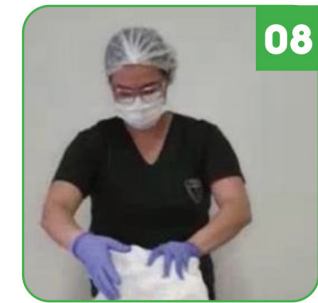

08 Discard coverall

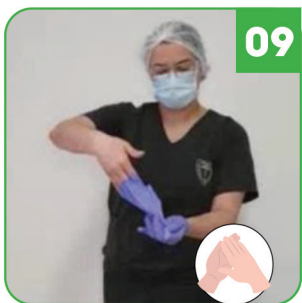

09 Take off gloves and hand hygiene

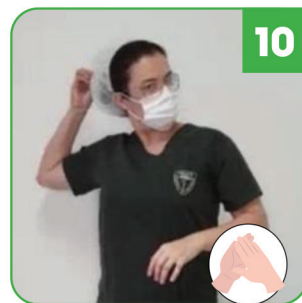

10 Remove head cap and hand hygiene

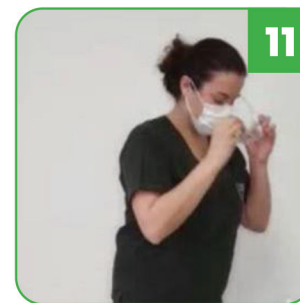

11 Remove eye protection

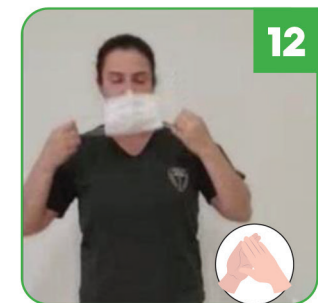

12 Remove mask and hand hygiene
